# Supplementary material
Source: MDPI journal article supplement (https://www.mdpi.com/2673-6004/4/1/11)
Supplement: s1 [file s1]

# Supplemental document

**Table S1.** The common names, scientific names, and abbreviations of 43 bird species.

| Common Name                  | Abbreviation | Scientific Name                |
|------------------------------|--------------|--------------------------------|
| Magnolia Warbler             | MAWA         | <i>Setophaga magnolia</i>      |
| Black-throated Green Warbler | BTNW         | <i>Setophaga virens</i>        |
| Nashville Warbler            | NAWA         | <i>Leiothlypis ruficapilla</i> |
| American Redstart            | AMRE         | <i>Setophaga ruticilla</i>     |
| Ovenbird                     | OVEN         | <i>Seiurus aurocapilla</i>     |
| Tennessee Warbler            | TEWA         | <i>Leiothlypis peregrina</i>   |
| Black-throated Blue Warbler  | BTBW         | <i>Setophaga caerulescens</i>  |
| Grace's Warbler              | GRWA         | <i>Setophaga graciae</i>       |
| Yellow-rumped Warbler        | YRWA         | <i>Setophaga coronata</i>      |
| Hooded Warbler               | HOWA         | <i>Setophaga citrina</i>       |
| Chestnut-sided Warbler       | CSWA         | <i>Setophaga pensylvanica</i>  |
| Cape May Warbler             | CMWA         | <i>Setophaga tigrina</i>       |
| Palm Warbler                 | PAWA         | <i>Setophaga palmarum</i>      |
| Blackburnian Warbler         | BLBW         | <i>Setophaga fusca</i>         |
| Orange-crowned Warbler       | OCWA         | <i>Leiothlypis celata</i>      |
| Bay-breasted Warbler         | BBWA         | <i>Setophaga castanea</i>      |
| Northern Parula              | NOPA         | <i>Setophaga americana</i>     |
| Yellow Warbler               | YEWA         | <i>Setophaga petechia</i>      |
| Virginia's Warbler           | VIWA         | <i>Leiothlypis virginiae</i>   |
| Connecticut Warbler          | CONW         | <i>Oporornis agilis</i>        |
| Pine Warbler                 | PIWA         | <i>Setophaga pinus</i>         |
| Lucy's Warbler               | LUWA         | <i>Leiothlypis luciae</i>      |
| Blackpoll Warbler            | BLPW         | <i>Setophaga striata</i>       |
| Northern Waterthrush         | NOWA         | <i>Parkesia noveboracensis</i> |
| Common Yellowthroat          | COYE         | <i>Geothlypis trichas</i>      |
| Prairie Warbler              | PRAW         | <i>Setophaga discolor</i>      |
| Worm-eating Warbler          | WEWA         | <i>Helmitheros vermivorum</i>  |
| Blue-winged Warbler          | BWWA         | <i>Vermivora cyanoptera</i>    |
| Golden-winged Warbler        | GWWA         | <i>Vermivora chrysoptera</i>   |
| Golden-cheeked Warbler       | GCWA         | <i>Setophaga chrysoparia</i>   |
| Hermit Warbler               | HEWA         | <i>Setophaga occidentalis</i>  |
| Prothonotary Warbler         | PROW         | <i>Protonotaria citrea</i>     |
| Black-and-white Warbler      | BAWW         | <i>Mniotilta varia</i>         |
| Black-throated Gray Warbler  | BTYW         | <i>Setophaga nigrescens</i>    |
| Cerulean Warbler             | CERW         | <i>Setophaga cerulea</i>       |
| Townsend's Warbler           | TOWA         | <i>Setophaga townsendi</i>     |
| Yellow-throated Warbler      | YTWA         | <i>Setophaga dominica</i>      |
| Red-faced Warbler            | RFWA         | <i>Cardellina rubrifrons</i>   |
| Canada Warbler               | CAWA         | <i>Cardellina canadensis</i>   |
| Louisiana Waterthrush        | LOWA         | <i>Parkesia motacilla</i>      |
| Wilson's Warbler             | WIWA         | <i>Cardellina pusilla</i>      |
| Colima Warbler               | COLW         | <i>Leiothlypis crissalis</i>   |
| Kentucky Warbler             | KEWA         | <i>Geothlypis formosa</i>      |

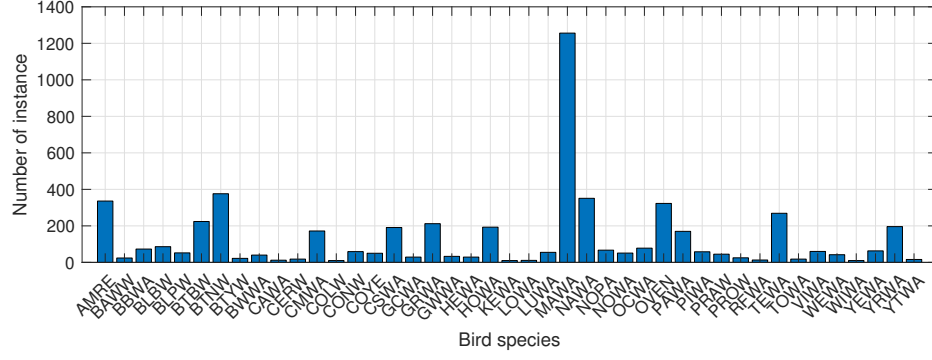

**Fig. S1.** The number of instances for all bird species in the CLO-43DS dataset. Here, the x-axis denotes the abbreviations of common names of those 43 bird species, which can be found in Table S1.

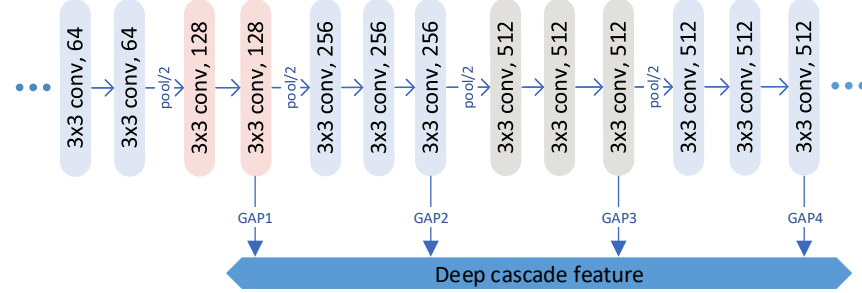

**Fig. S2.** Flowchart of bird sound classification system. Here, four main steps are included which are preprocessing, multi-view representation, model training, and classification

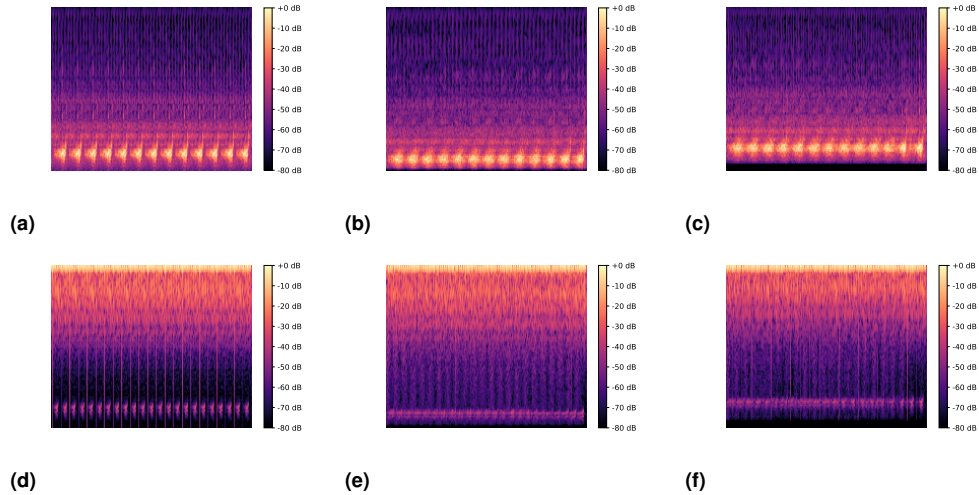

**Fig. S3.** The example of *Setophaga occidentalis* and *Vermivora chrysoptera* using pitch shift. (a) original *Setophaga occidentalis*, (b) *Setophaga occidentalis* using pitch shift with a factor of 2, (c) *Setophaga occidentalis* using pitch shift with a factor of -2. (d) original *Vermivora chrysoptera*, (e) *Vermivora chrysoptera* using pitch shift with a factor of 2, (f) *Vermivora chrysoptera* using pitch shift with a factor of -2.

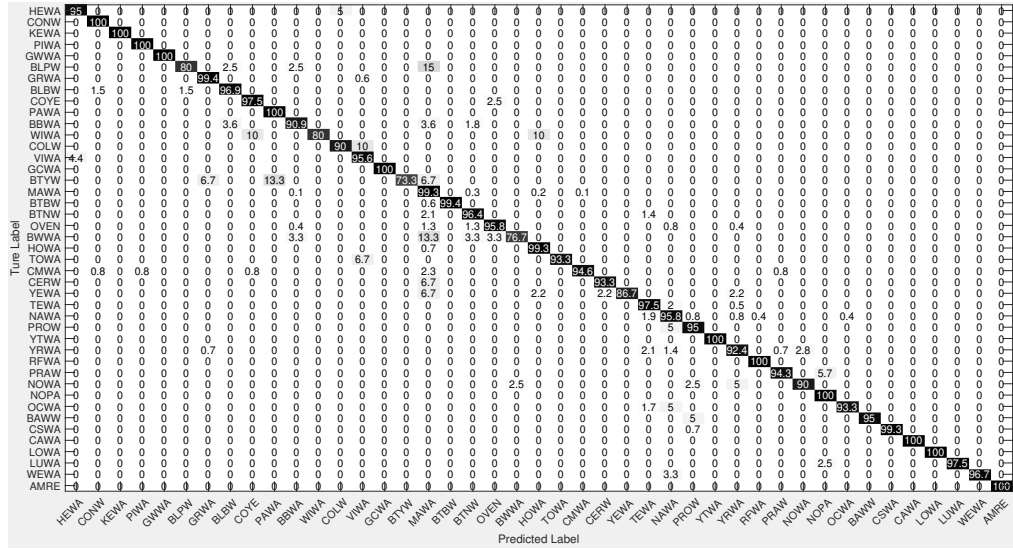

**Fig. S4.** Confusion matrix (%) of the best result using the fusion of selected pre-trained models. Here, the x and y axes denote the code of each bird species to be classified. The x-axis is the true label and y-axis is the predicted label.
